# Supplementary material for: Agile methods for embedded systems development - a literature review and a mapping study
Source: Springer Nature journal article supplement (doi:10.1186/1687-3963-2013-15), 2013-11-15

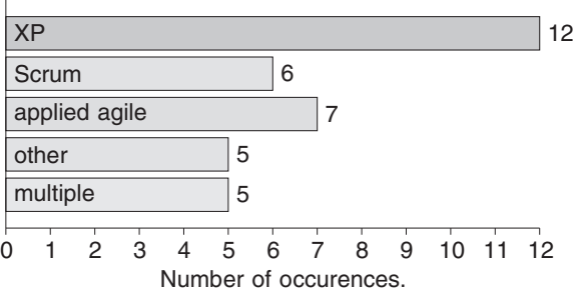

Supplement: 13639_2013_26_MOESM4_ESM.pdf [file 13639_2013_26_MOESM4_ESM.pdf]
